# Supplementary material for: DNA damage triggers SAF-A and RNA biogenesis factors exclusion from chromatin coupled to R-loops removal
Source: PubMed Central journal article supplement — Nucleic Acids Res. 2014 Jul 16;42(14):9047–62. doi: 10.1093/nar/gku601 (PMC4132723; doi:10.1093/nar/gku601), 2014-07-16
Supplement: supp_gku601_nar-00694-d-2014-File008.pdf [file supp_gku601_nar-00694-d-2014-File008.pdf]

## SUPPLEMENTARY MATERIAL

### Mass spectrometry analysis.

Each lane was systematically cut into 8-10 homogenous slices (fractions) and subjected to in-gel tryptic digestion using modified porcine trypsin (Promega, France) at 20 ng/ $\mu$ l as previously described (1). The dried peptide extracts obtained were dissolved in 14  $\mu$ l of 0.05% trifluoroacetic acid in 10% acetonitrile and analysed by online nanoLC using an Ultimate 3000 system (Dionex, Amsterdam, The Netherlands) coupled to an nanospray LTQ Orbitrap XL mass spectrometer (Thermo Fisher Scientific, Bremen, Germany). 5 $\mu$ l of each peptide extract were loaded on a 300  $\mu$ m ID x 5mm PepMap C18 precolumn (LC Packings, Dionex, USA) at 20  $\mu$ l/min in 2% acetonitrile, 0.05% trifluoroacetic acid. After 5 minutes desalting, peptides were online separated on a 75  $\mu$ m ID x 15 cm C18 PepMap™ column (LC Packings, Dionex, USA). The flow rate was set at 300 nl/min. Peptides were eluted using a 0 to 50% linear gradient of solvent B in 60 min (solvent A was 0.2% formic acid in 5% acetonitrile and solvent B was 0.2% formic acid in 80% acetonitrile). The LTQ Orbitrap was operated in data-dependent acquisition mode with the XCalibur software (version 2.0 SR2, Thermo Fisher Scientific), using a 60 s dynamic exclusion window to prevent repetitive selection of the same peptide. The survey scan MS was performed in the Orbitrap on the 300-2000 m/z mass range with the resolution set to a value of 60 000 at m/z 400. The five most intense ions per survey scan were selected for MS/MS fragmentation and the resulting fragments were analyzed in the linear trap (parallel mode). The Mascot Daemon software (version 2.2.0, Matrix Science, London, UK) was used for protein identification in batch mode by searching against a non-redundant SwissProt and Trembl Human databases implemented with the SAF-A RDB-GFP-FLAG recombinant protein sequence. Peak lists extraction from Xcalibur raw files were automatically performed through the Mascot Daemon interface using ExtractMSN macro (Thermo Fischer Scientific). Cysteine carbamidomethylation was set as a fixed modification and methionine oxidation, serine/threonine phosphorylation and arginine dimethylation as variable modifications. Up to two missed trypsin cleavages were allowed. Mass tolerances in MS and MS/MS were set to 5 ppm and 0.8 Da, respectively. Mascot results were parsed with the in-house developed software Mascot File Parsing and Quantification (MFPaQ) version 4.0 (2), and protein hits were automatically validated if they satisfied one of the following criteria: identification with at least one top ranking peptide with a Mascot score of more than 49 (*p* value < 0.001) or at

least two top ranking peptides with a Mascot score of more than 32 ( $p$  value  $< 0.05$ ) and with peptides each of a minimal length of 6 amino acids.

From all the validated result files corresponding to the fractions of a 1D gel lane, MFPaQ was used to generate a unique, non-redundant list of proteins. The software compares proteins or protein groups (composed of all the proteins matching the same set of peptides) and creates clusters from protein groups found in different gel slices if they have one common member. This feature allowed a global list to be edited of unique proteins (or clusters) representing the entire sample analyzed in each gel lane. The global protein lists obtained from the two biological samples from HT1080 cells stably expressing a flag-tagged GFP- SAF-A RDB were compared to extract a list of common proteins. In the same way, this new list was compared to the control protein list from the HT1080 cells stably expressing a flag-tagged GFP to extract the list of specific proteins from HT1080 cells stably expressing a flag-tagged GFP- SAF-A RDB corresponding to the partners of SAF-A RDB domain (supplementary table S4).

#### **SUPPLEMENTARY FIGURE LEGENDS :**

##### **Figure S1. SAF-A dynamics in response to DNA damage and identification of partners.**

**A/** Analysis by immunofluorescence of XRCC4 dynamics and of PAR production at stripes of laser damage 2 min after microirradiation in HT1080 cells pretreated or not with PARPi (DPQ). Scale bar, 20  $\mu$ m. **B/** PAR-binding assay on membrane. Extracts from HT1080 cells stably expressing of FLAG-GFP (1), SAF-A-WT-FLAG-GFP (2), SAF-A-dRBD-FLAG-GFP (3), and SAF-A-RBD-FLAG-GFP (4) were electro-transferred on membrane in duplicate. One membrane was probed with anti-GFP antibody and the other incubated with PAR, washed and then blotted with anti-PAR antibody. **C/** Analysis by immunofluorescence of RNA Pol II and  $\gamma$ H2AX, 1 and 10 min after microirradiation in HT1080 cells. Scale bar, 10  $\mu$ m. **D/** Time-course of fluorescence variation in the non-irradiated nuclear area in laser-irradiated HT1080 cells expressing SAF-A-GFP under PARPi (DPQ) treatment. Images were obtained at 22 s intervals and fluorescence intensities in the non-irradiated and irradiated areas were quantified at each time point. Mean values with SEM of the percentage of fluorescence in the non-irradiated nuclear area vs total nuclear fluorescence were calculated from measurements of 16 independent cells. **E/** HT1080 cells were mock-treated or treated with 10 nM Cali for the indicated time in min or for 1 h followed by incubation in fresh medium for the indicated post-treatment time. Cells were then fractionated as described in the material and methods

section, leading to isolation of the chromatin fractions 4 (F4). Protein samples were denatured and separated on SDS-PAGE gel, followed by electrotransfer and blotting as indicated. **F/** Gel staining after separation of inputs and immunoprecipitates of extracts of HT1080 cells expressing SAF-A-RBD-FLAG-GFP (RBD) or FLAG-GFP (Ctrl) as indicated. **G/** Interaction landscape representing proteins reproducibly co-immunoprecipitated with the RBD domain of SAF-A. To the new interactions identified here were implemented previously known interactions as reported in the String database and in the literature. The legends « proteins whose depletion increases  $\gamma$ H2AX » and « proteins found in PAR co-IP » refer to references (3) and (4), respectively. The proteins excluded from damaged chromatin were reported in the present data and in references (5-7).

**Figure S2. Links between transcription and dynamics of SAF-A or FUS in response to DNA damage.**

**A/** FRAP curves on undamaged or laser-irradiated areas. FRAP experiments were performed on HT1080 cells expressing SAF-A-GFP and pretreated with DPQ. The same nuclear strip was bleached before (non-irradiated area) and 2 min after pulsed laser micro-irradiation (irradiated area, corresponding to SAF-A-GFP exclusion area). The graph shows FRAP curves of mean values with SEM of 44 independent fluorescence measurements. **B/** Monitoring transcription by incorporation of EU in HT1080 cells in the presence of DRB, Actinomycin D or  $\alpha$ -amanitin. Scale bar, 20  $\mu$ m. **C/** Effect of DNA damage by calicheamicin (Cali) and/or transcription inhibition (DRB) on FRAP curve for SAFA-GFP. Images were obtained at 487 ms intervals. The data were normalized to the prebleach fluorescence level. The graph shows FRAP curves of mean values with SEM of 29, 29, 24 and 31 independent fluorescence measurements for conditions with DRB, DRB + Cali, Cali and no agent, respectively. **D/** HT1080 cells grown on glass slides were permeabilized in buffer containing or not RNaseA prior to fixation. Then cells were immunostained for nucleolin. Scale bar, 20  $\mu$ m. **E/** HT1080 cells expressing SAF-A-GFP and grown on glass slides were laser irradiated. After 2 min, cells were permeabilized in buffer containing or not RNaseA prior to fixation. Then cells were immunostained for  $\gamma$ H2AX and the DNA stained with propidium iodide. Scale bar, 20  $\mu$ m. **F/** Effect of a PARPi (DPQ) and a transcription inhibitor (actinomycin D) on the dynamics of SAF-A-GFP at laser-damaged sites. Images were obtained at 22 s intervals, and fluorescence intensities at the damage sites were quantified. Mean values of the fluorescence intensities with SEM were calculated from 16, 20 and 28 independent measurements for conditions with actinomycin D, actinomycin D+DPQ and DPQ,

respectively. **G/** Effect of a transcription inhibitor (DRB) on dynamics of SAF-A-GFP and FUS-GFP at laser-damaged sites in the presence of PARPi (DPQ). Images were obtained at 22 s intervals, and fluorescence intensities at the damage sites were quantified. Mean values of the fluorescence intensities with SEM were calculated for SAF-A-GFP from 25 and 21 independent measurements for conditions with and without DRB, respectively and for FUS-GFP from 25 and 21 independent measurements for conditions with and without DRB, respectively. **H/** Monitoring transcription by incorporation of EU in HT1080 cells under control conditions or in the presence of DPQ or DPQ and PIKKS inhibitors. Scale bar, 20  $\mu$ m.

**Figure S3.** **A/** Effect of transcription inhibition (actinomycin D) on FRAP curve for mutant mCherry-RNaseHI. Images were obtained at 487 ms intervals. The data were normalized to the prebleach fluorescence level. The graph shows FRAP curves of mean values with standard deviation of 23 and 29 independent fluorescence measurements for conditions without or with actinomycin D, respectively. **B/** Dynamics of mutant RNaseHI at laser-damaged sites in HT1080 cells was measured in the presence or not of diospyrin D1 as indicated. Images were obtained at 7.75 s intervals, and fluorescence intensities at the damage sites were quantified. Mean values of the fluorescence intensities with SEM were calculated from 17 and 20 independent measurements for conditions with and without diospyrin, respectively. **C/** Effect of diospyrin D1 on dynamics of SAF-A-GFP at laser-damaged sites. Images were obtained at 7.75 s intervals, and fluorescence intensities at the damage sites were quantified. Mean values of the fluorescence intensities with SEM were calculated from 52 and 47 independent measurements for conditions with and without diospyrin, respectively. **D/** Effect of diospyrin D1 on dynamics of SAF-A-GFP at laser-damaged sites in the presence of PARPi (DPQ). Images were obtained at 7.75 s intervals, and fluorescence intensities at the damage sites were quantified. Mean values of the fluorescence intensities with SEM were calculated from 32 and 22 independent measurements for conditions with and without diospyrin, respectively.

## SUPPLEMENTARY REFERENCES

1. Shevchenko, A., Wilm, M., Vorm, O. and Mann, M. (1996) Mass spectrometric sequencing of proteins silver-stained polyacrylamide gels. *Anal Chem*, **68**, 850-858.
2. Bouyssie, D., Gonzalez de Peredo, A., Mouton, E., Albigot, R., Roussel, L., Ortega, N., Cayrol, C., Burlet-Schiltz, O., Girard, J.P. and Monsarrat, B. (2007) Mascot file parsing and quantification (MFPaQ), a new software to parse, validate, and quantify proteomics data generated by ICAT and SILAC mass spectrometric analyses: application to the proteomics study of membrane proteins from primary human endothelial cells. *Mol Cell Proteomics*, **6**, 1621-1637.



3. Paulsen, R.D., Soni, D.V., Wollman, R., Hahn, A.T., Yee, M.C., Guan, A., Hesley, J.A., Miller, S.C., Cromwell, E.F., Solow-Cordero, D.E. *et al.* (2009) A genome-wide siRNA screen reveals diverse cellular processes and pathways that mediate genome stability. *Mol Cell*, **35**, 228-239.
4. Gagne, J.P., Isabelle, M., Lo, K.S., Bourassa, S., Hendzel, M.J., Dawson, V.L., Dawson, T.M. and Poirier, G.G. (2008) Proteome-wide identification of poly(ADP-ribose) binding proteins and poly(ADP-ribose)-associated protein complexes. *Nucleic Acids Res*, **36**, 6959-6976.
5. Adamson, B., Smogorzewska, A., Sigoillot, F.D., King, R.W. and Elledge, S.J. (2012) A genome-wide homologous recombination screen identifies the RNA-binding protein RBMX as a component of the DNA-damage response. *Nat Cell Biol*, **14**, 318-328.
6. Beli, P., Lukashchuk, N., Wagner, S.A., Weinert, B.T., Olsen, J.V., Baskcomb, L., Mann, M., Jackson, S.P. and Choudhary, C. (2012) Proteomic Investigations Reveal a Role for RNA Processing Factor THRAP3 in the DNA Damage Response. *Mol Cell*, **46**, 212-225.
7. Polo, S.E., Blackford, A.N., Chapman, J.R., Baskcomb, L., Gravel, S., Rusch, A., Thomas, A., Blundred, R., Smith, P., Kzhyshkowska, J. *et al.* (2012) Regulation of DNA-End Resection by hnRNPU-like Proteins Promotes DNA Double-Strand Break Signaling and Repair. *Mol Cell*, **45**, 505-516.

## SUPPLEMENTARY TABLES :

**Table S1 : list of primers used.**

| ID                       | Sequence                                            | Restriction site(s) |
|--------------------------|-----------------------------------------------------|---------------------|
| FLAG-S                   | GATCCGCCGCCACCATGACGCGTGATTACAAGGATGACGACGATAAGCCA  | BamHI MluI          |
| FLAG-AS                  | CCGGTGGCTTATCGTCGTCATCCTTGTAAATCACGCGTCATGGTGGCGGCG | BamHI MluI          |
| SAFA-F                   | CCGGATCCGCCGCCACCATGAGTTCCTCGCCTG                   | BamHI               |
| SAFA-R                   | CCGACGCGTATGCATATAATATCCTTGGTGATAATGC               | MluI                |
| SAFA <sub>AdDBD</sub> -F | CCGGATCCGCCGCCACCATGGATAAAAAGAGGGGTGTTAAAAGACC      | BamHI               |
| SAFA <sub>AdRBD</sub> -R | CCACGCGTAAGAGCCTTTTTGCTTCTTCTCC                     | MluI                |
| SAFA-RBD-F               | CCGGATCCGCCGCCACCATGCCACCAGAAAAGAAACAGAACACTGGC     | BamHI               |
| FUS-F                    | CCGGATCCGCCGCCACCATGGCCTCAAACGATTATACCCAACAAGC      | BamHI               |
| FUS-R                    | GCCACGCGTATACGGCCTCTCCCTGCGATCCTGTCTGTGCTCACC       | MluI                |
| NLS-S                    | AGCTTGCCACCATGACGCGTGGCCCCAAGAAAAAGCGGAAAGTGGGA     | HindIII AgeI        |
| NLS-AS                   | CCGGTCCCACCTTCCGCTTTTTCTTGGGGCCACGCGTCATGGTGGCA     | HindIII AgeI        |

**Table S2 : list of antibodies used.**

| Antibody             | Host      | Source         | Clone/catalog   | Use                    |
|----------------------|-----------|----------------|-----------------|------------------------|
| $\beta$ -actin       | Mouse     | Ambion         | AC-15           | WB: 1/10 000           |
| DNA ligase IV        | Rabbit    | AbD Serotec    | AHP554          | WB: 1/2000             |
| Ph-DNA-PKcs (S2056)  | Rabbit    | Abcam          | ab18192         | WB: 1/200              |
| FLAG                 | Mouse     | Sigma-Aldrich  | M2 / F-1804     | WB: 1/1000             |
| FUS/TLS              | Mouse     | BD Biosciences | 15/TLS / 611385 | IF: 1/40<br>WB: 1/1000 |
| GFP-booster          | Synthetic | Chromotek      | gba488          | IF: 1/200              |
| $\gamma$ H2AX (S139) | Mouse     | Millipore      | JBW301 / 05-636 | IF: 1/500              |

|                      |        |                                                  |                          |                                                          |
|----------------------|--------|--------------------------------------------------|--------------------------|----------------------------------------------------------|
|                      |        |                                                  |                          | WB: 1/1000                                               |
| $\gamma$ H2AX (S139) | Rabbit | Assay designs                                    | 905 771 100              | IF: 1/1000                                               |
| HP-1 $\alpha$        | Mouse  | gift from R. Losson,<br>IGBMC, Illkirch, France  | 2HP-2G9                  | WB: 1/2000                                               |
| Ku80                 | Mouse  | Abcam                                            | S10B1 / ab2173           | WB: 1/1000                                               |
| mCherry              | rabbit | Abcam                                            | ab62341                  | IF: 1/800<br>WB: 1/1000                                  |
| Nucleolin/C23        | rabbit | Santa Cruz Biotech.                              | H-250 / sc-13057         | IF: 1/300                                                |
| PAR                  | Rabbit | BD Pharmingen                                    | 551813                   | WB: 1/2000                                               |
| PAR                  | Mouse  | Trevigen                                         | 4335-AMC                 | IF : 1/200                                               |
| RNA pol. II          | Mouse  | Santa Cruz Biotech.                              | 8WG16 / sc-56767         | IF: 1/25<br>WB: 1/100                                    |
| SAF-A                | Mouse  | Santa Cruz Biotech.                              | 3G6 / sc-32315           | IF: 1/300 or 1/100 with<br>pre-extraction<br>WB: 1/100   |
| TAF15/TAFII68        | Mouse  | Eurogentec                                       | 7TA-2B11 /<br>IGTAF-2B11 | IF : 1/100 or 1/200 with<br>pre-extraction<br>WB: 1/1000 |
| XRCC4                | Rabbit | Home-made serum                                  | NA                       | WB: 1/1000                                               |
| RNA :DNA hybrids     | Mouse  | gift from Dr SH Leppla<br>NIH, Bethesda, MD, USA | S9.6                     | IF : 1/100                                               |

NA: not applicable.

**Table S3: list of inhibitors used.**

| Inhibitor          | Global target           | Source                                                         | Stock                     | Use                    |
|--------------------|-------------------------|----------------------------------------------------------------|---------------------------|------------------------|
| DPQ                | PAR synthesis           | Sigma-Aldrich                                                  | 16.5 mM/DMSO              | 40 $\mu$ M 2h          |
| NU1025             | PAR synthesis           | Calbiochem                                                     | 100 mM/DMSO               | 100 $\mu$ M 30 min     |
| DRB                | Transcription           | Sigma-Aldrich                                                  | 31 mM/DMSO                | 100 $\mu$ M 2 h        |
| actinomycin D      | Transcription           | Sigma-Aldrich                                                  | 5 mM/DMSO                 | 2.25 $\mu$ g/ml 40 min |
| $\alpha$ -amanitin | Transcription           | Sigma-Aldrich                                                  | 1 mg/ml /H <sub>2</sub> O | 50 $\mu$ g/ml 5 h      |
| NU7441             | DNA-PK                  | Tocris-Bioscience                                              | 5 mM /DMSO                | 10 $\mu$ M 1 h         |
| KU55933            | ATM                     | Tocris-Bioscience                                              | 10 mM/DMSO                | 15 $\mu$ M 1 h         |
| VE-821             | ATR                     | Tinib-tools                                                    | 10 mM/DMSO                | 20 $\mu$ M 25 min      |
| Diospyrin D1       | Spliceosome<br>assembly | Gift from B. Hazra,<br>Jadavpur University,<br>Calcutta, India | 5 mM/DMSO                 | 10 $\mu$ M 24 h        |

**Table S4 : proteins associated to the C-terminal RBD SAF-A domain.**

| <b>Protein name</b>                                                                                                                                                                     | <b>Gene name</b>     | <b>Best score<sup>a</sup></b> | <b>Number of peptides<sup>b</sup></b> | <b>Sequence Coverage (%)</b> |
|-----------------------------------------------------------------------------------------------------------------------------------------------------------------------------------------|----------------------|-------------------------------|---------------------------------------|------------------------------|
| Spectrin alpha chain, brain                                                                                                                                                             | SPTAN1               | 1800                          | 97                                    | 44                           |
| Splicing factor 3B subunit 2                                                                                                                                                            | SF3B2                | 1880                          | 86                                    | 59                           |
| Neuroblast differentiation-associated protein<br>AHNAK                                                                                                                                  | AHNAK                | 708                           | 72                                    | 14                           |
| Splicing factor 3B subunit 3                                                                                                                                                            | SF3B3                | 1750                          | 66                                    | 54                           |
| Splicing factor, proline- and glutamine-rich                                                                                                                                            | SFPQ                 | 879                           | 56                                    | 54                           |
| Splicing factor 3A subunit 1                                                                                                                                                            | SF3A1                | 926                           | 51                                    | 57                           |
| Superkiller viralicidic activity 2-like 2                                                                                                                                               | SKIV2L2              | 710                           | 51                                    | 47                           |
| Putative uncharacterized protein DKFZp762M013<br>(Fragment)                                                                                                                             | DKFZp762M013         | 442                           | 50                                    | 58                           |
| Heterogeneous nuclear ribonucleoprotein U-like<br>protein 1                                                                                                                             | HNRNPUL1             | 1247                          | 49                                    | 47                           |
| AP-2 complex subunit beta                                                                                                                                                               | AP2B1                | 773                           | 41                                    | 49                           |
| Polyadenylate-binding protein 1                                                                                                                                                         | PABPC1               | 699                           | 40                                    | 61                           |
| Heterogeneous nuclear ribonucleoprotein U<br>cDNA FLJ54492, highly similar to Eukaryotic<br>translation initiation factor 4B                                                            | HNRNPU               | 463<br>443                    | 39<br>38                              | 35<br>52                     |
| Interleukin enhancer-binding factor 3                                                                                                                                                   | ILF3                 | 470                           | 36                                    | 43                           |
| Heterogeneous nuclear ribonucleoprotein A1                                                                                                                                              | HNRNPA1              | 807                           | 34                                    | 61                           |
| <b>TAF15 RNA polymerase II, TATA box binding<br/>protein (TBP)-associated factor, 68kDa, isoform<br/>CRA_a</b>                                                                          | <b>TAF15</b>         | <b>387</b>                    | <b>34</b>                             | <b>55</b>                    |
| Thyroid hormone receptor associated protein 3,<br>isoform CRA_a                                                                                                                         | THRAP3               | 227                           | 33                                    | 31                           |
| Cleavage stimulation factor subunit 3                                                                                                                                                   | CSTF3                | 696                           | 29                                    | 43                           |
| Plasminogen activator inhibitor 1 RNA-binding<br>protein                                                                                                                                | SERBP1               | 621                           | 29                                    | 60                           |
| WD40 repeat-containing protein SMU1                                                                                                                                                     | SMU1                 | 279                           | 29                                    | 48                           |
| Pre-mRNA-processing factor 19                                                                                                                                                           | PRPF19               | 689                           | 27                                    | 65                           |
| Far upstream element-binding protein 1                                                                                                                                                  | FUBP1                | 330                           | 27                                    | 43                           |
| Heterogeneous nuclear ribonucleoprotein A3<br>cDNA FLJ55635, highly similar to pre-mRNA-<br>splicing factor ATP-dependent RNA helicase DHX15<br>(EC 3.6.1.-)                            | HNRNPA3              | 710<br>405                    | 25<br>25                              | 39<br>28                     |
| Heterogeneous nuclear ribonucleoproteins A2/B1<br>cDNA FLJ46581 fis, clone THYMU3043200, highly<br>similar to Splicing factor 3A subunit 3                                              | HNRNPA2B1            | 681<br>402                    | 24<br>24                              | 69<br>48                     |
| Heterogeneous nuclear ribonucleoprotein Q<br>cDNA, FLJ92657, highly similar to Homo sapiens<br>heterogeneous nuclear ribonucleoprotein C (C1/C2)<br>(HNRPC), transcript variant 2, mRNA | SYNCRIP              | 367<br>261                    | 24<br>21                              | 45<br>55                     |
| Bcl-2-associated transcription factor 1<br><b>RNA-binding protein FUS</b>                                                                                                               | BCLAF1<br><b>FUS</b> | 118<br><b>313</b>             | 20<br><b>18</b>                       | 18<br>33                     |
| Heterogeneous nuclear ribonucleoprotein H<br>cDNA FLJ30038 fis, clone 3NB692001511, highly<br>similar to Homo sapiens heterogeneous nuclear                                             | HNRNPH1<br>HNRPAB    | 238<br>279                    | 18<br>18                              | 49<br>42                     |

ribonucleoprotein A/B (HNRPAB), transcript variant 2, mRNA

|                                                  |           |     |    |    |
|--------------------------------------------------|-----------|-----|----|----|
| Pre-mRNA-processing factor 17                    | CDC40     | 209 | 18 | 38 |
| Splicing factor 3A subunit 2                     | SF3A2     | 189 | 17 | 27 |
| Transcription elongation regulator 1             | TCERG1    | 81  | 16 | 13 |
| Replication protein A 70 kDa DNA-binding subunit | RPA1      | 234 | 14 | 34 |
| Splicing factor 3B subunit 4                     | SF3B4     | 479 | 12 | 32 |
| Cyclin-K                                         | CCNK      | 214 | 12 | 24 |
| Salt-tolerant protein                            | STP       | 134 | 11 | 25 |
| Myosin regulatory light chain 12A                | MYL12A    | 209 | 10 | 55 |
| Splicing factor 3B subunit 5                     | SF3B5     | 133 | 8  | 91 |
| Neurabin-2                                       | PPP1R9B   | 132 | 8  | 10 |
| Pre-mRNA branch site protein p14                 | SF3B14    | 110 | 6  | 41 |
| Transitional endoplasmic reticulum ATPase        | VCP       | 96  | 6  | 10 |
| HCG2039797 (Fragment)                            | Tcr-alpha | 321 | 2  | 38 |

---

<sup>a</sup> The best Mascot protein score is given when the protein was identified in several 1D gel fractions from one of the replicate sample

<sup>b</sup> The total number of unique peptides assigned to a protein in the 1D gel fraction where it showed the best Mascot score and sequence coverage.

Proteins displayed in bold correspond to the coprecipitated proteins, FUS/TLS and TAFII68/TAF15, chosen for further analysis.

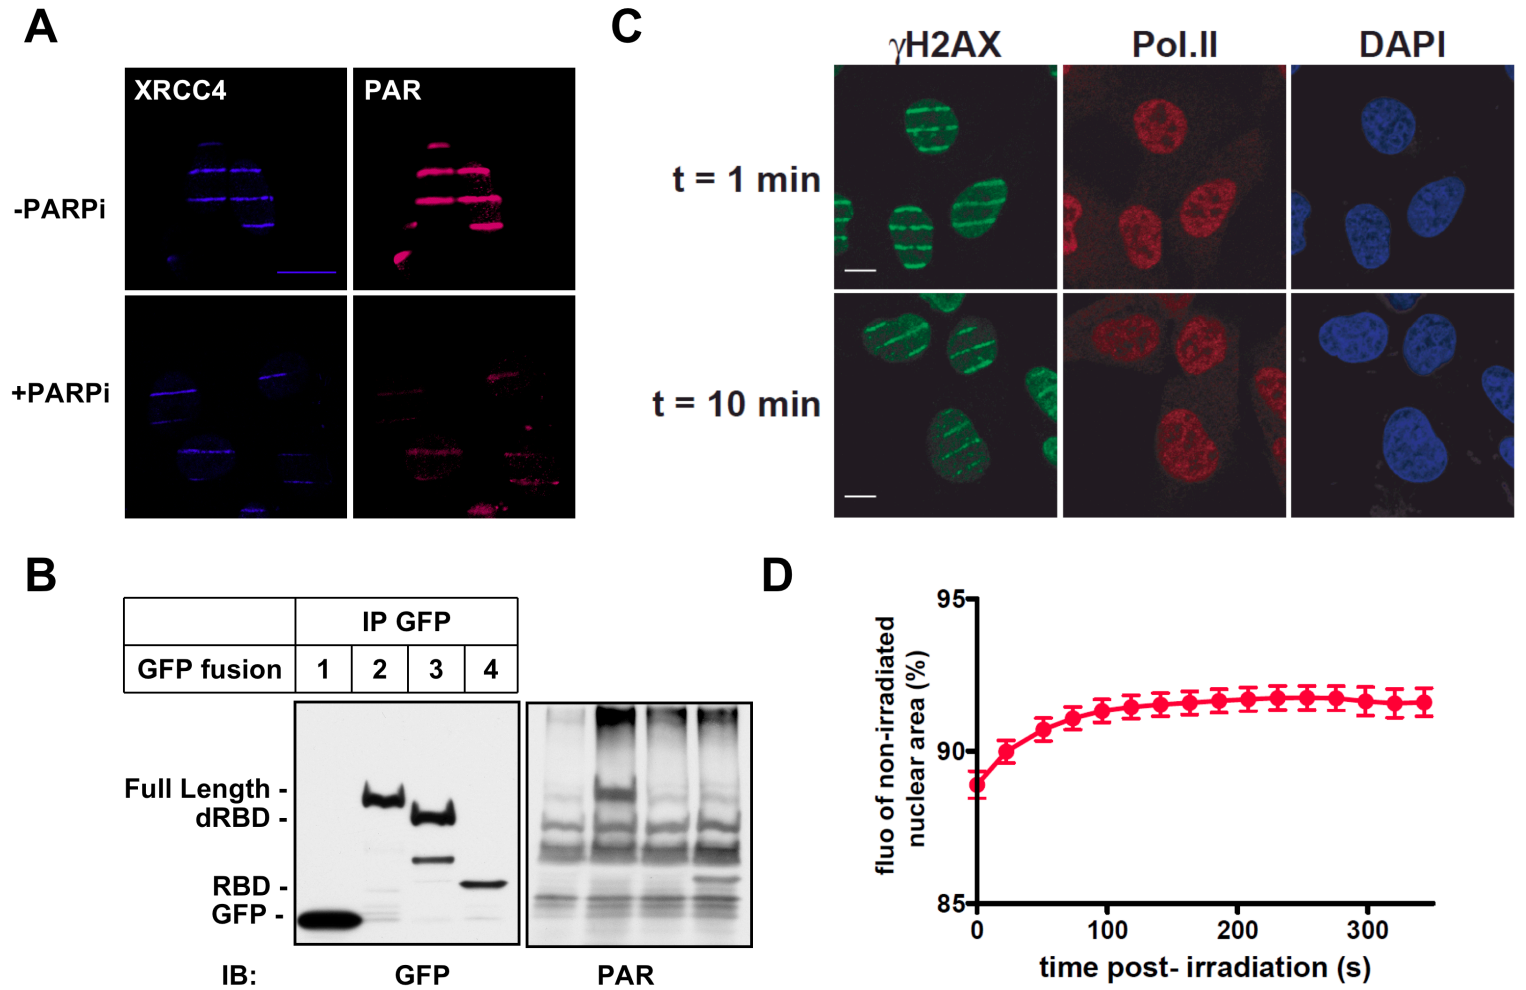

Supplementary Figure S1

**E**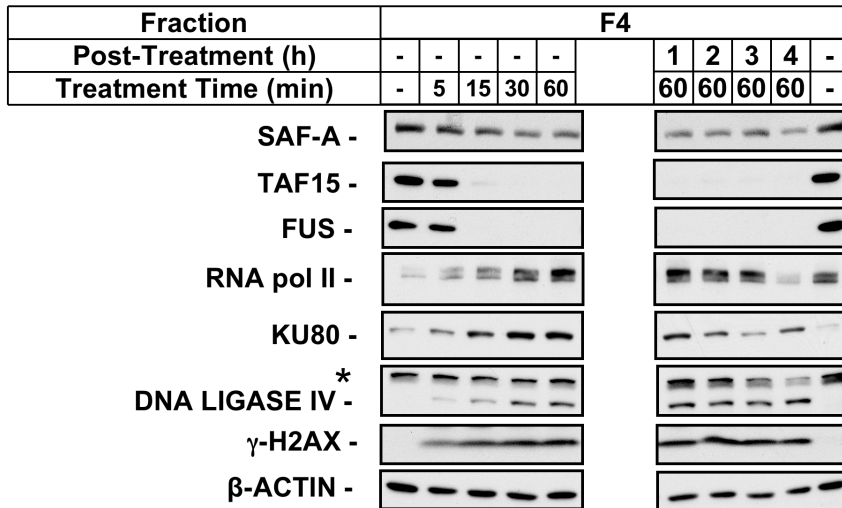**F**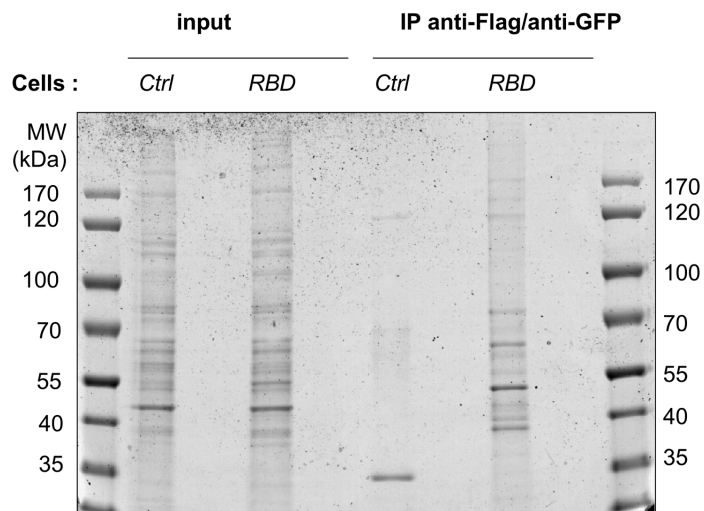

Supplementary Figure S1



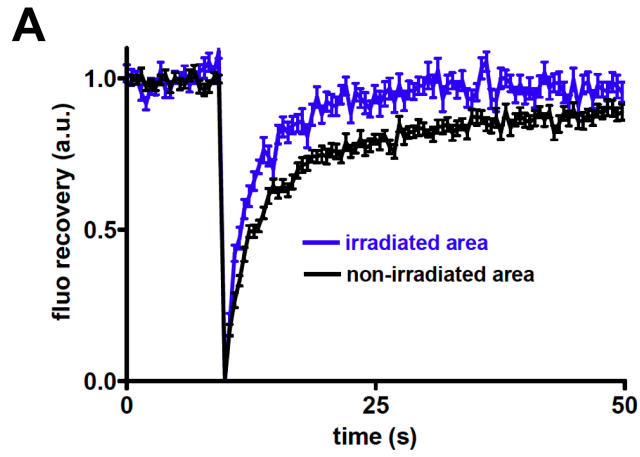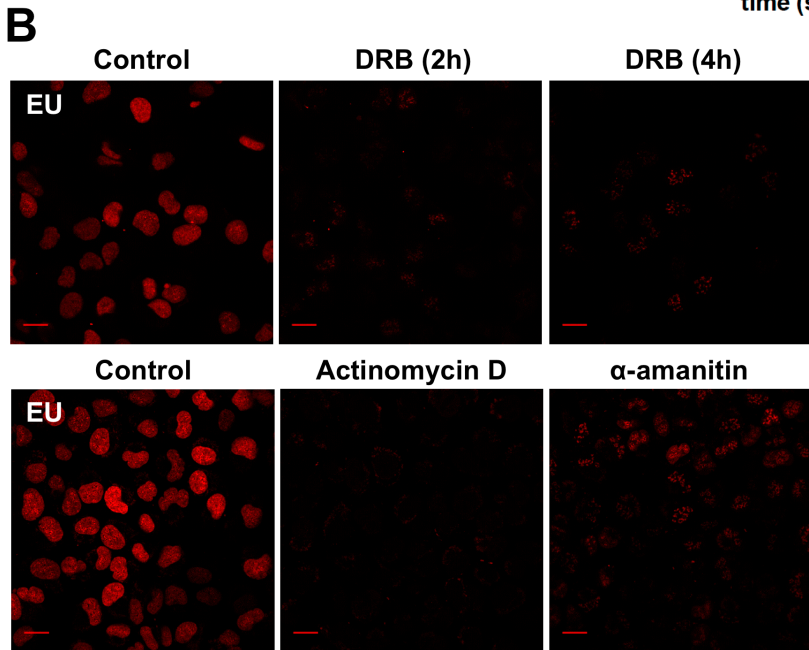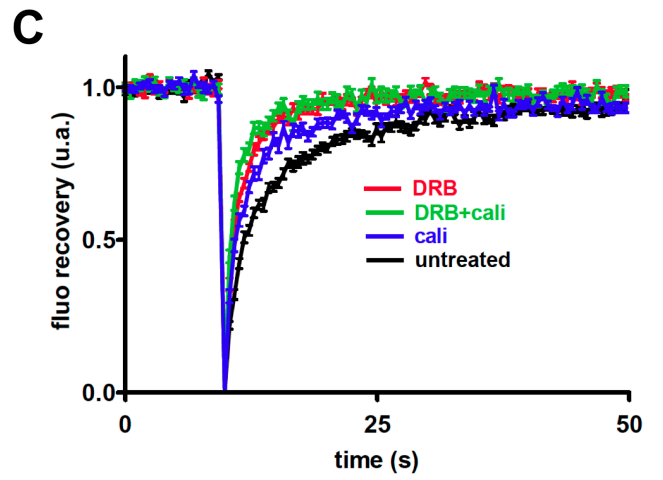

Supplementary Figure S2



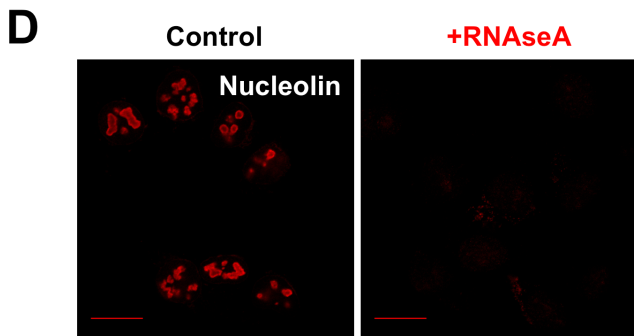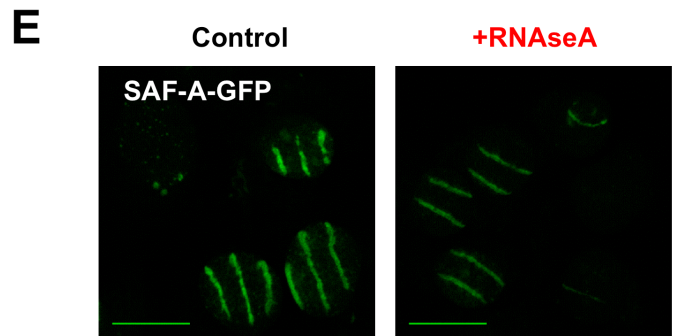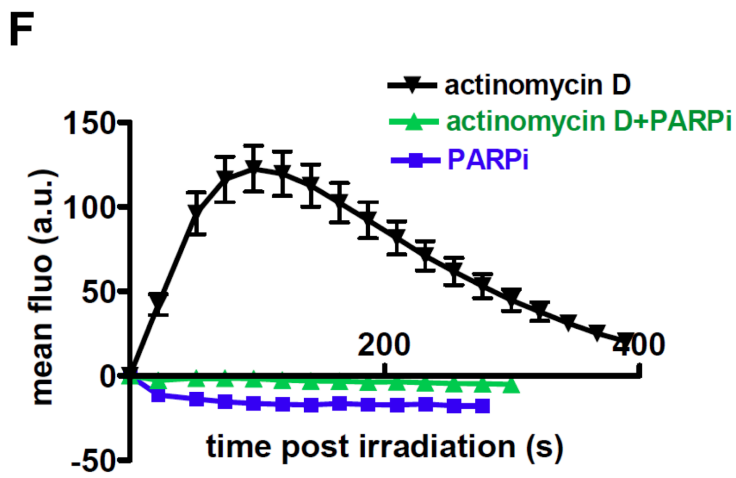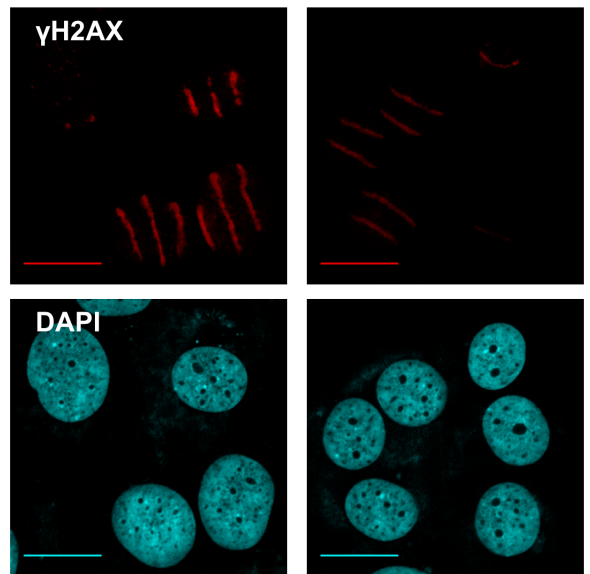

Supplementary Figure S2

**G**

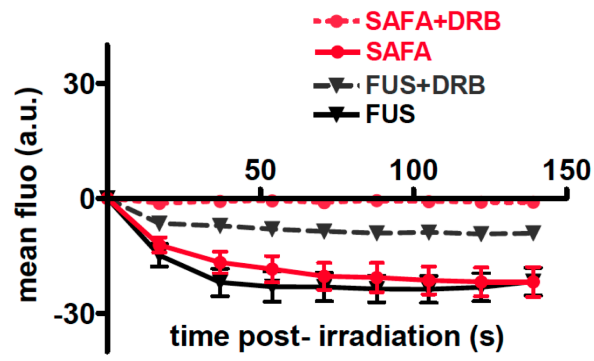

**H**

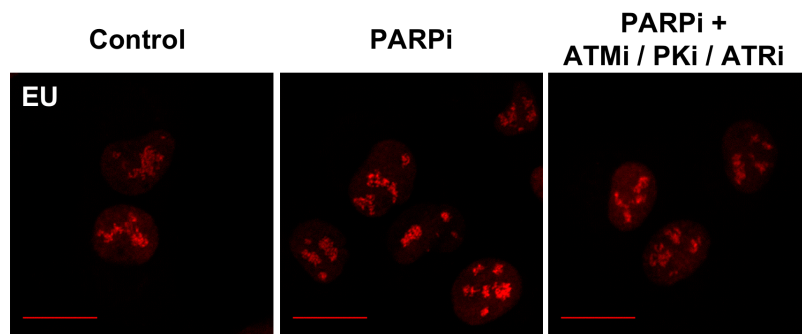

Supplementary Figure S2

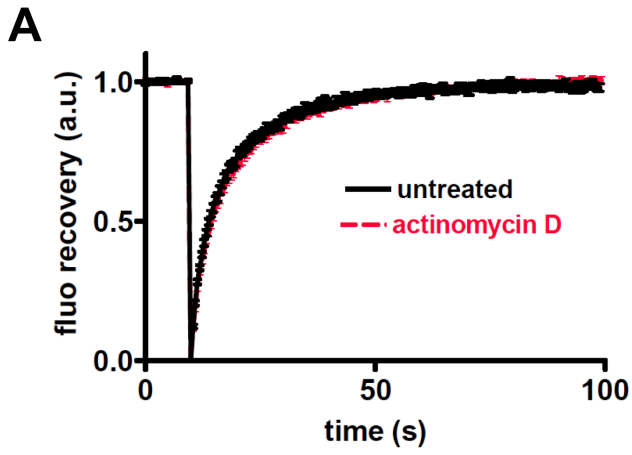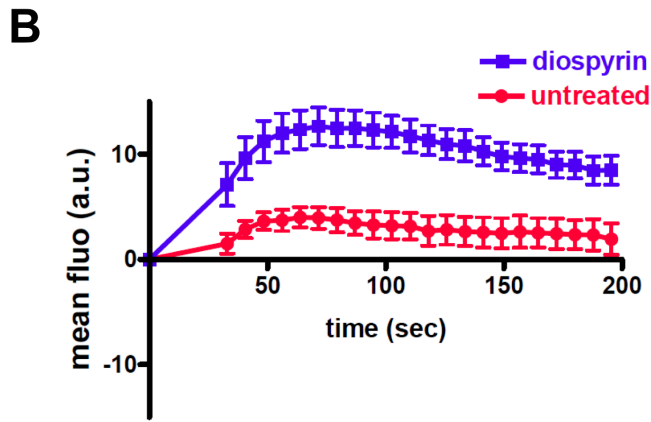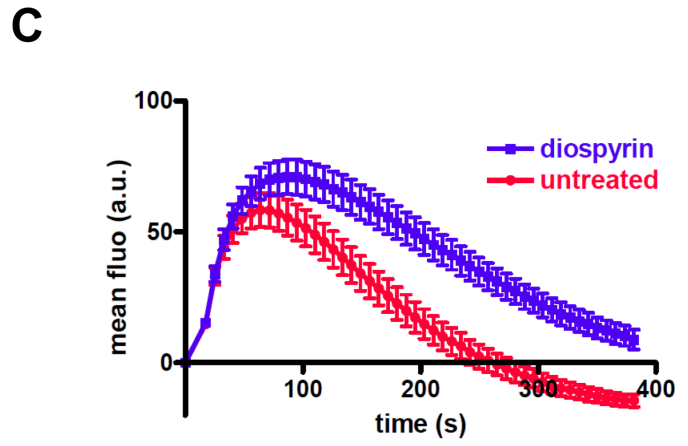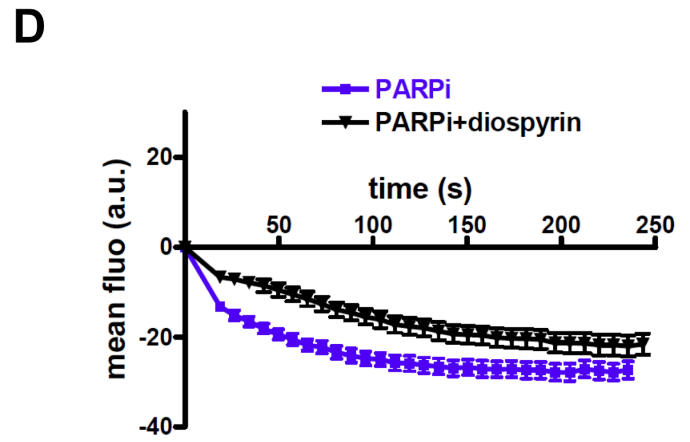

Supplementary Figure S3
